# Supplementary material for: TEMPO-oxidized cellulose nanofibril/polyvalent cations hydrogels: a multifaceted view of network interactions and inner structure
Source: Springer Nature journal article supplement (doi:10.1007/s10570-023-05058-2), 2023-01-22
Supplement: MOESM1 [file 23944332]

## Supplementary Information:

### TEMPO-oxidized cellulose nanofibril/polyvalent cations hydrogels: A multifaceted view of network interactions and inner structure

Arianna Rossetti,<sup>a,b</sup> Alessandro Paciaroni,<sup>c</sup> Barbara Rossi,<sup>d,e</sup> Cettina Bottari,<sup>d</sup> Lucia Comez,<sup>f</sup> Silvia Corezzi,<sup>c</sup> Lucio Melone,<sup>a,g</sup> László Almásy,<sup>h</sup> Carlo Punta<sup>a,b</sup> and Andrea Fiorati.<sup>\*a,b</sup>

<sup>a</sup> Politecnico di Milano, Department of Chemistry, Materials and Chemical Engineering "G. Natta", via Mancinelli 7, 20131, Milano, Italy.

<sup>b</sup> INSTM - Local Unit c/o Politecnico di Milano, via Mancinelli 7, 20131, Milano, Italy.

<sup>c</sup> University of Perugia, Department of Physics and Geology, via A. Pascoli, 06123 Perugia, Italy.

<sup>d</sup> Elettra Sincrotrone Trieste, Strada Statale 14 km 163.5, Area Science Park, 34149 Basovizza, Trieste, Italy.

<sup>e</sup> University of Trento, Department of Physics, Via Sommarive 14, 38123 Povo, Trento, Italy.

<sup>f</sup> IOM-CNR c/o University of Perugia, Department of Physics and Geology, Via A. Pascoli, 06123 Perugia, Italy.

<sup>g</sup> Centro di Ricerca per l'Energia, l'Ambiente e il Territorio (CREAT), Università Telematica eCampus, Novedrate, Italy.

<sup>h</sup> Institute for Energy Security and Environmental Safety, Centre for Energy Research, Konkoly-Thege Miklós út 29-33, H-1121 Budapest, Hungary

Correspondence: [andrea.fiorati@polimi.it](mailto:andrea.fiorati@polimi.it)

#### This document includes:

S1 – X-Ray diffraction methods

Fig. S1 – X-Ray diffractogram of TOCNFs dispersion.

Fig. S2 – TEM and lateral size distribution.

Fig. S3 – SANS data set and fitting details.

Fig. S4 – UVRR spectra and fitting details.

Fig. S5 – UVRR and SANS parameters correlations.

References

### S1 – X-Ray diffraction methods

X-Ray diffractogram patterns were measured in the  $2\theta$  range  $5^\circ - 30^\circ$  (step size  $0.02^\circ$ , counting time 2 s per step, room temperature) by means of D2 Phaser (Bruker) Benchtop X-ray powder diffractometer equipped with a Bragg-Brentano reflection geometry (Cu-K $\alpha$ 1 radiation;  $\lambda = 0.154056$  nm. The crystallinity index (CI) was determined applying the Segal approach as shown in Equation 1:

$$CI = \frac{(I_{200} - I_{am})}{I_{200}} \times 100 \quad (1)$$

Where CI is crystallinity index (%),  $I_{200}$  the maximum intensity of the (200) reflection ( $2\theta = 22^\circ - 23^\circ$ ), and  $I_{am}$  is the lowest intensity of diffraction for amorphous part ( $2\theta = 18^\circ - 19^\circ$ ).<sup>1</sup>

Fig. S1 – X-Ray diffractogram of TOCNFs dispersion.

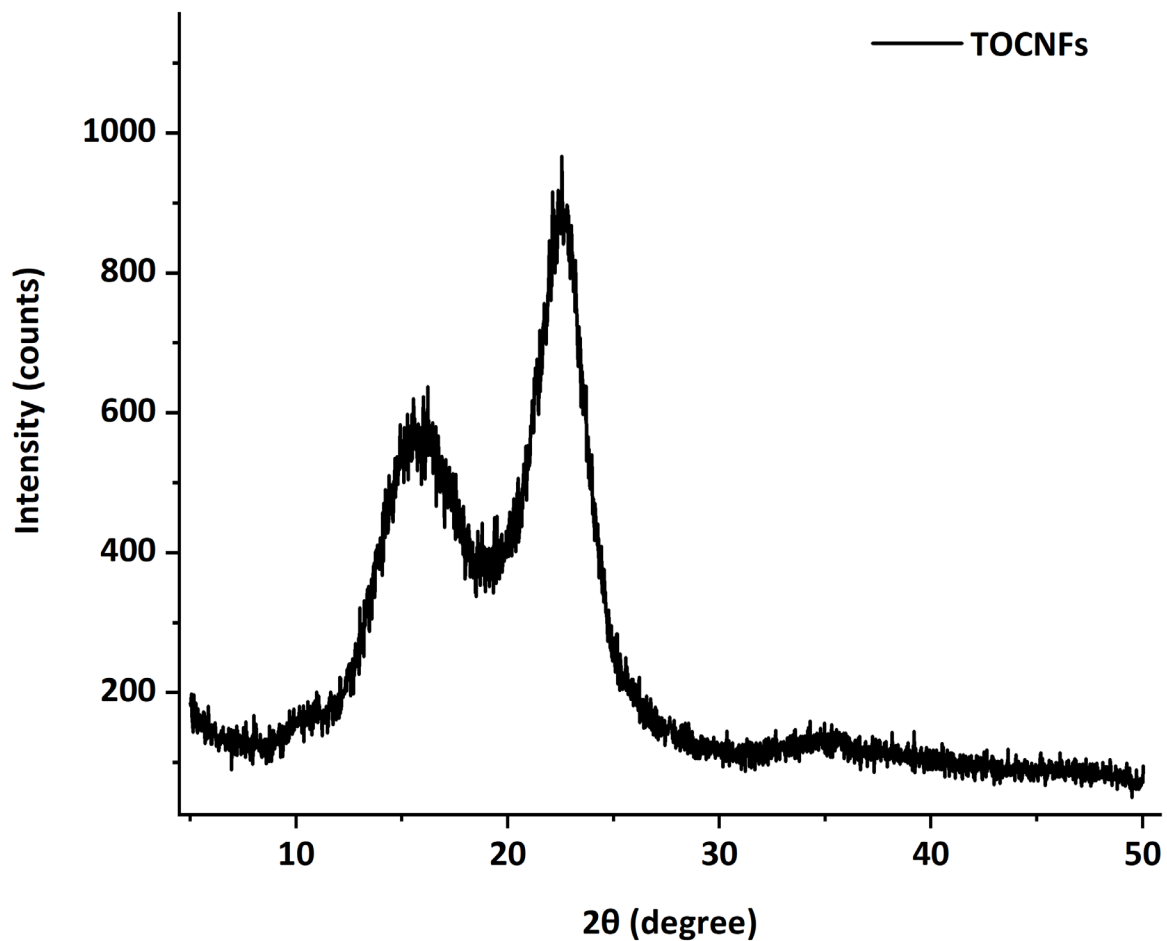

Fig. S2 – TEM and lateral size distribution.

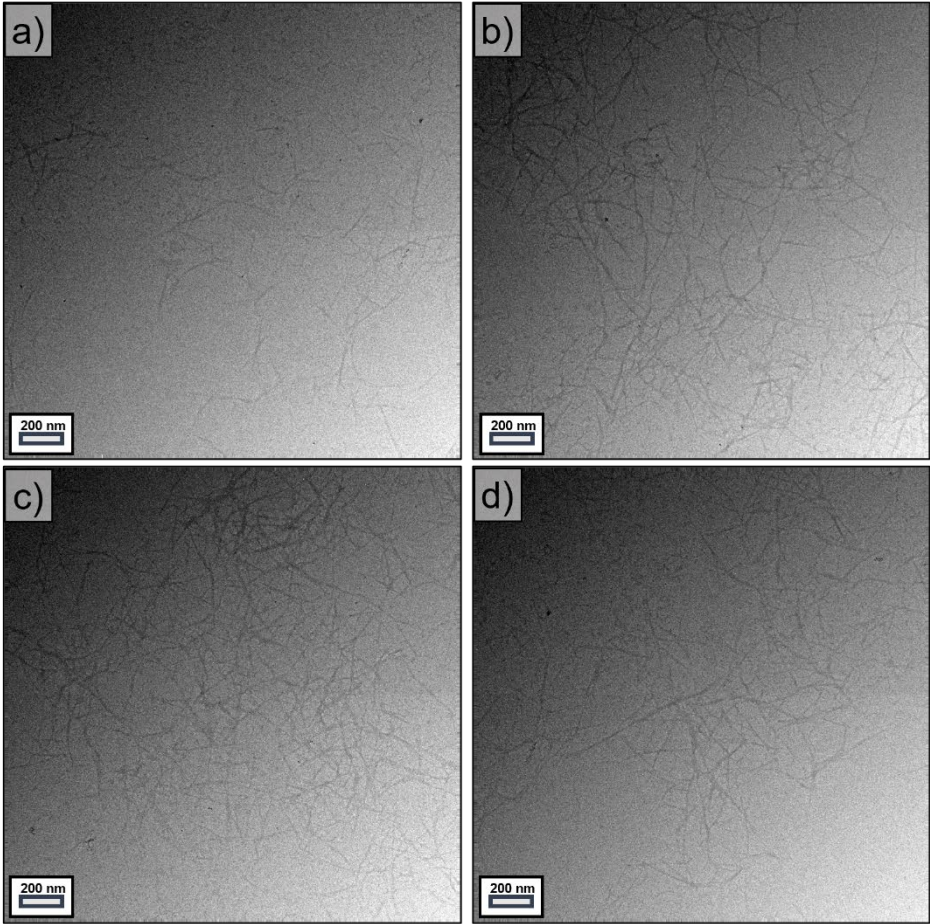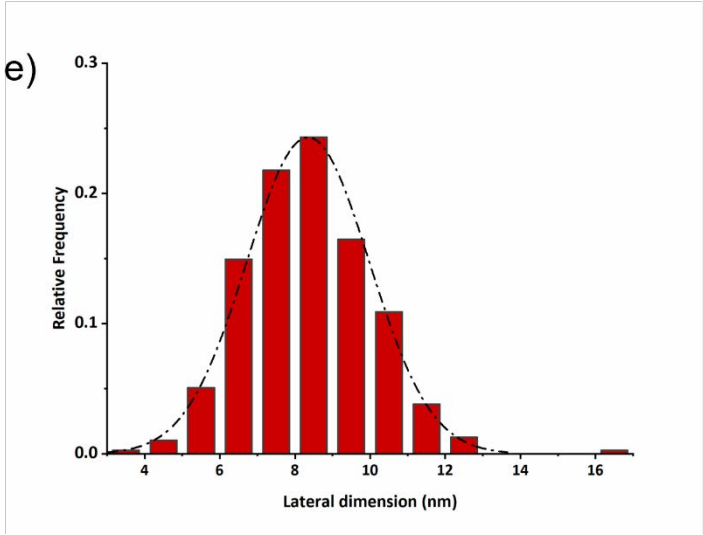

Fig. S3 – SANS data set and fitting details.

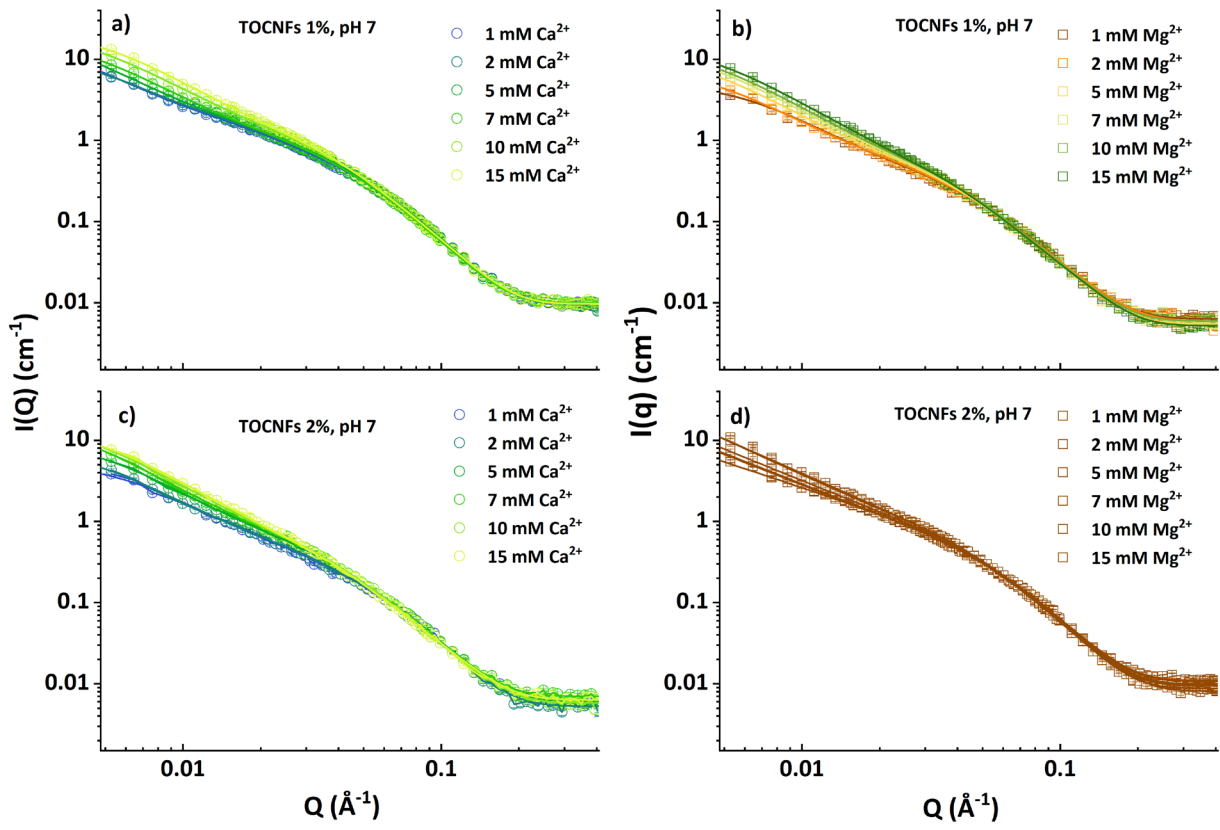

Fig. S4 – UVRR spectra and fitting details.

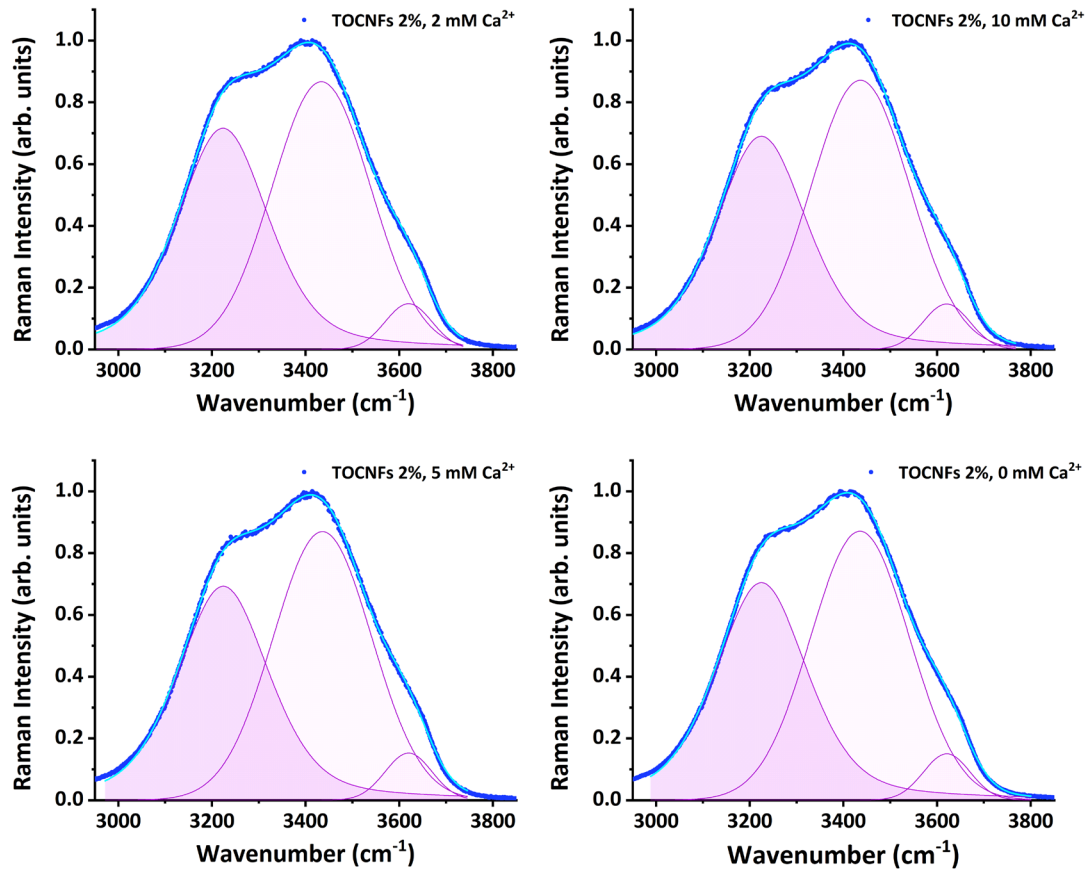

Fig. S5 – UVRR and SANS parameters correlations.

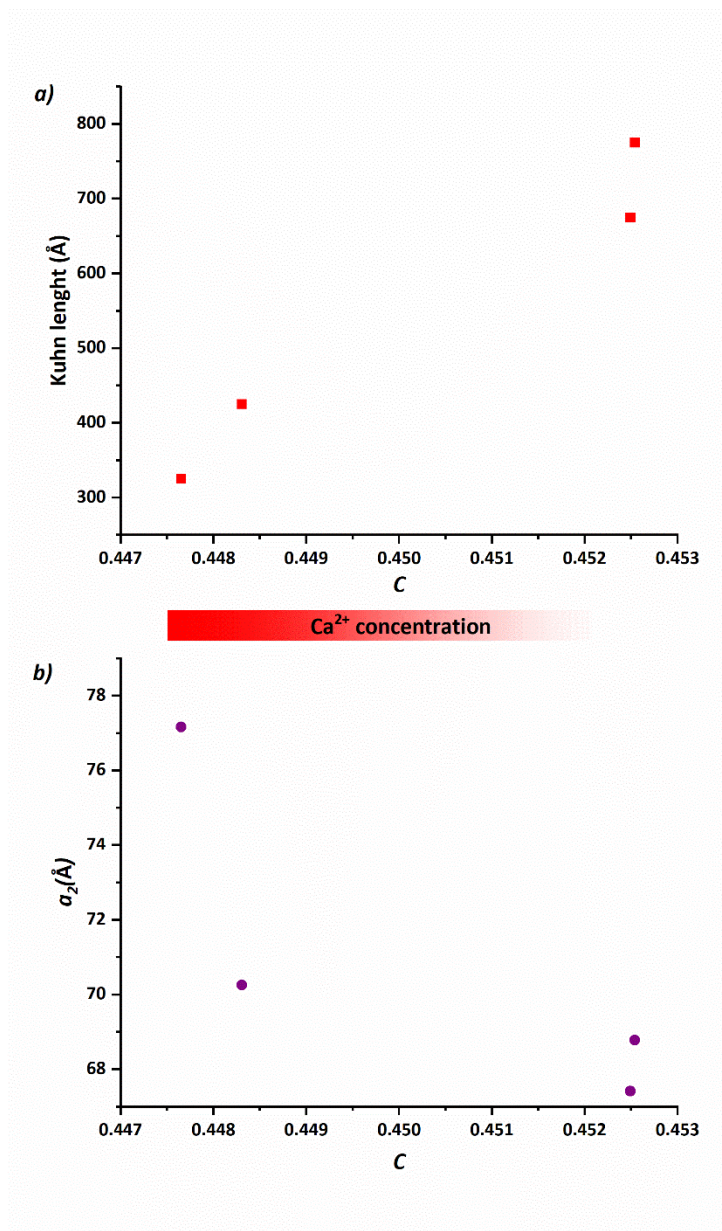

## References

1. Segal L, Creely JJ, Martin AE, Conrad CM. An Empirical Method for Estimating the Degree of Crystallinity of Native Cellulose Using the X-Ray Diffractometer. *Textile Research Journal*. 1959;29(10):786-794. doi:10.1177/004051755902901003
